# Supplementary material
Source: publisher figshare collection journal article supplement (https://acs.figshare.com/ndownloader/files/4277576)
Supplement: Supplementary file 1 [file 4277576]

## Supporting Information For:

### On the Interfacial Behavior of OEG-Linear Dendron Monolayers: Aggregation, Nanostructuring, and Electropolymerizability

Mary Jane Felipe, Nicel Estillore, Roderick Borong Pernites, Thu Nguyen, Ramakrishna Ponnampati, and Rigoberto C. Advincula

Department of Chemistry and Department of Chemical Engineering, University of Houston, Houston, Texas 77204-5003

#### I. Synthesis of $G_n$ CbzEG

The details of the synthesis of  $G_n$ CbzEG linear dendron macromolecules is published elsewhere.<sup>1</sup> This was accomplished by first synthesizing the carbazole dendrons following a convergent approach.

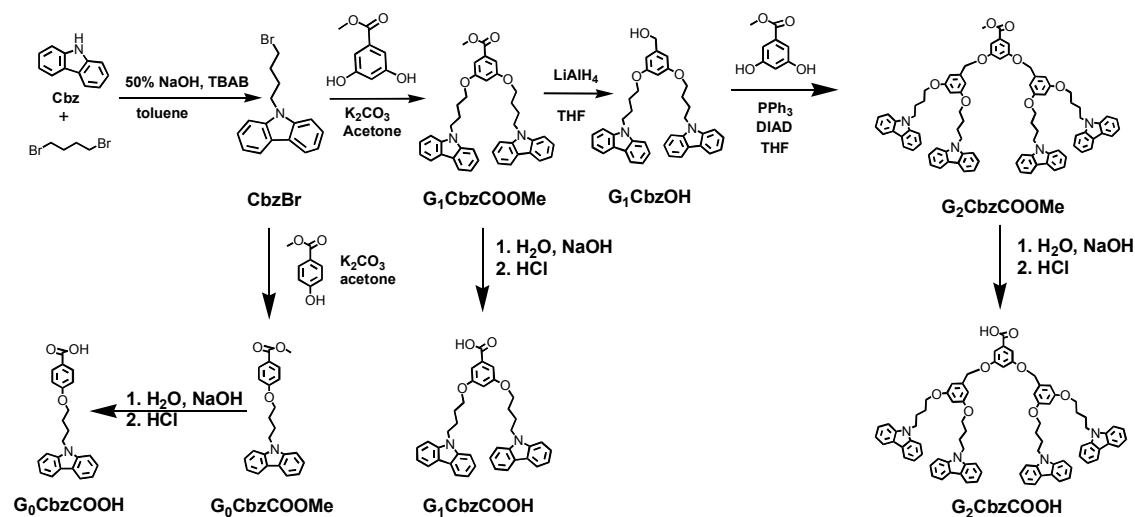

Figure S1. Synthesis scheme for the formation of the dendron.

Each of the carbazole dendrons with the carboxylic acid functional group was reacted with tetraethylene glycol via a dicyclohexylcarbodiimide (DCC) coupling protocol to afford the target  $G_n\text{CbztEG}$  molecules.

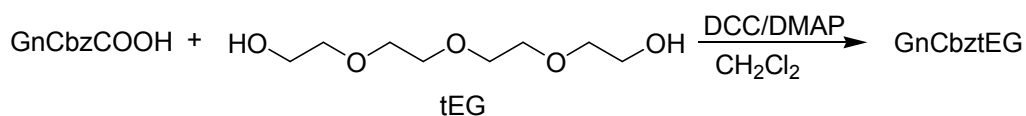

Gn = G0, G1, or G2

## II. Compression-Expansion (Hysteresis) Studies

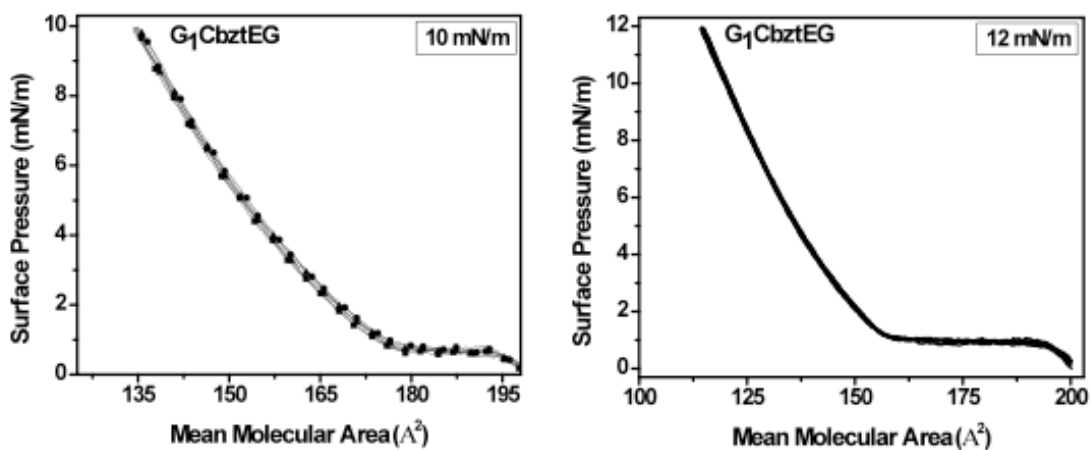

**Figure S2.** Hysteresis measurements showed the cyclic and monolayer stability of  $G_1\text{CbztEG}$

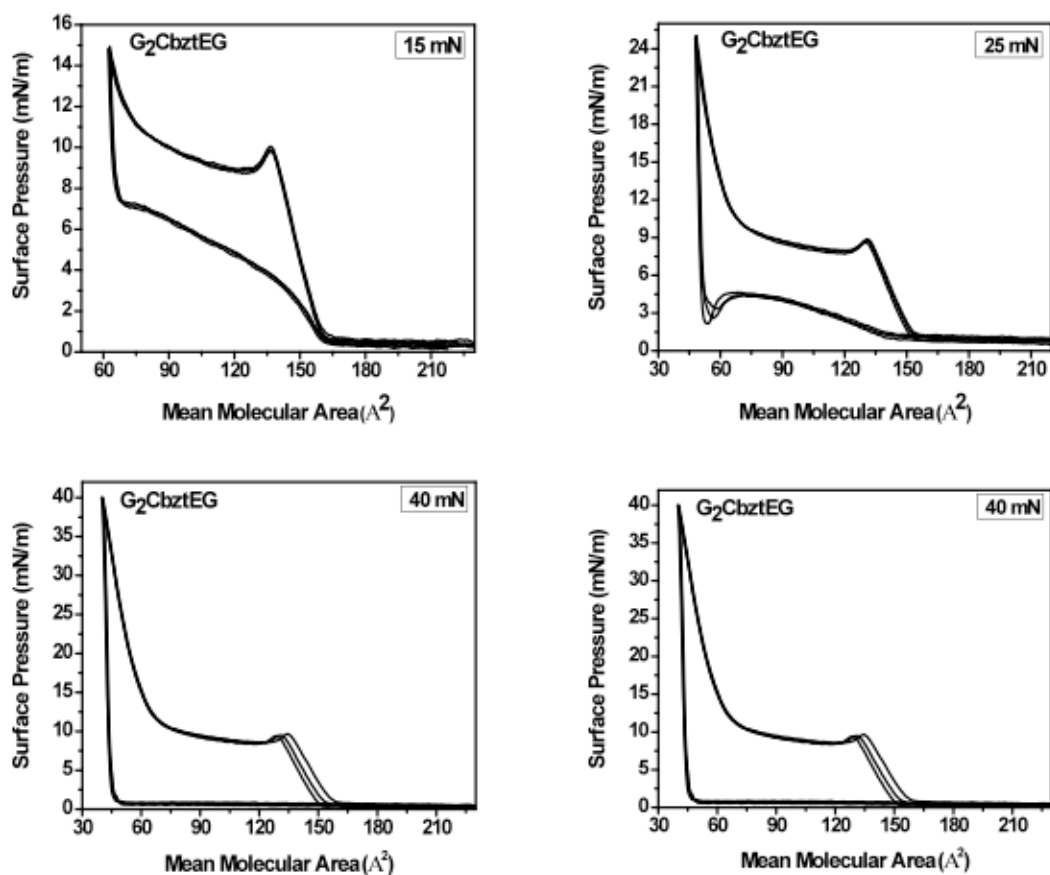

**Figure S3.** Hysteresis measurements showed the cyclic and monolayer stability of G<sub>2</sub>CbztEG

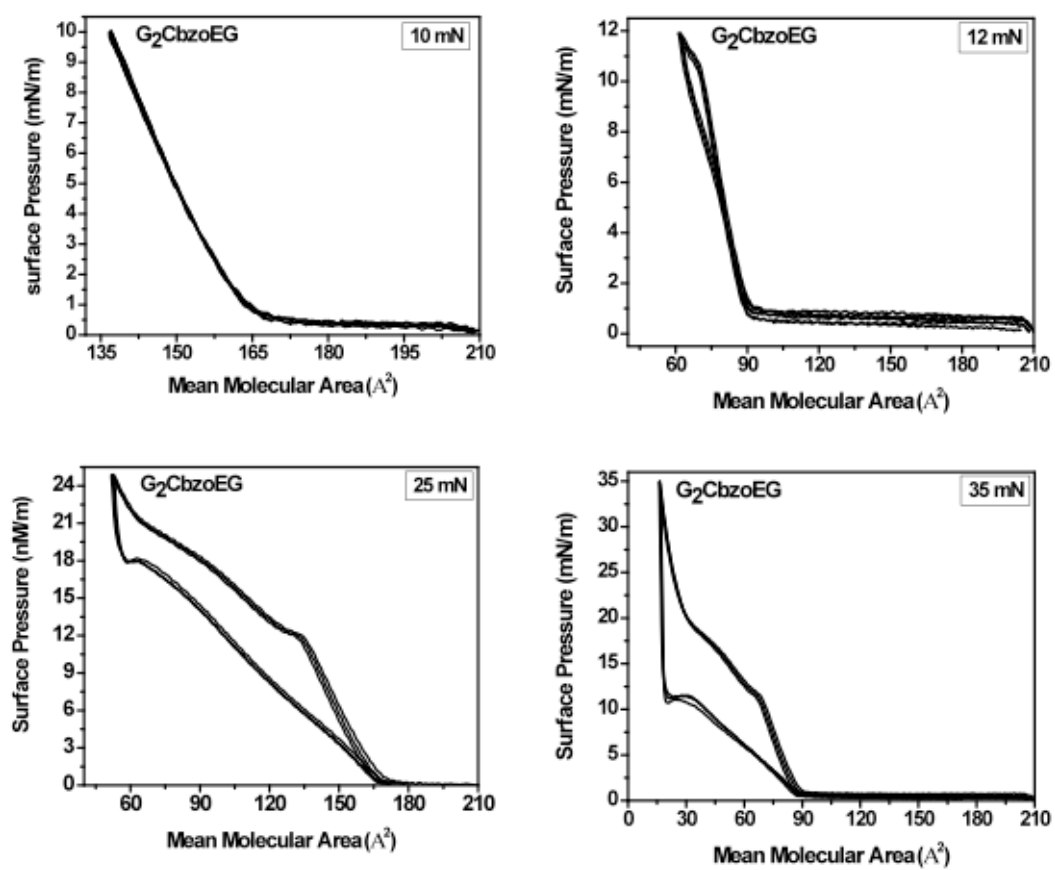

**Figure S4.** Hysteresis measurements showed the cyclic and monolayer stability of  $\text{G}_2\text{CbzoEG}$ .

### III. Surface Morphology Studies

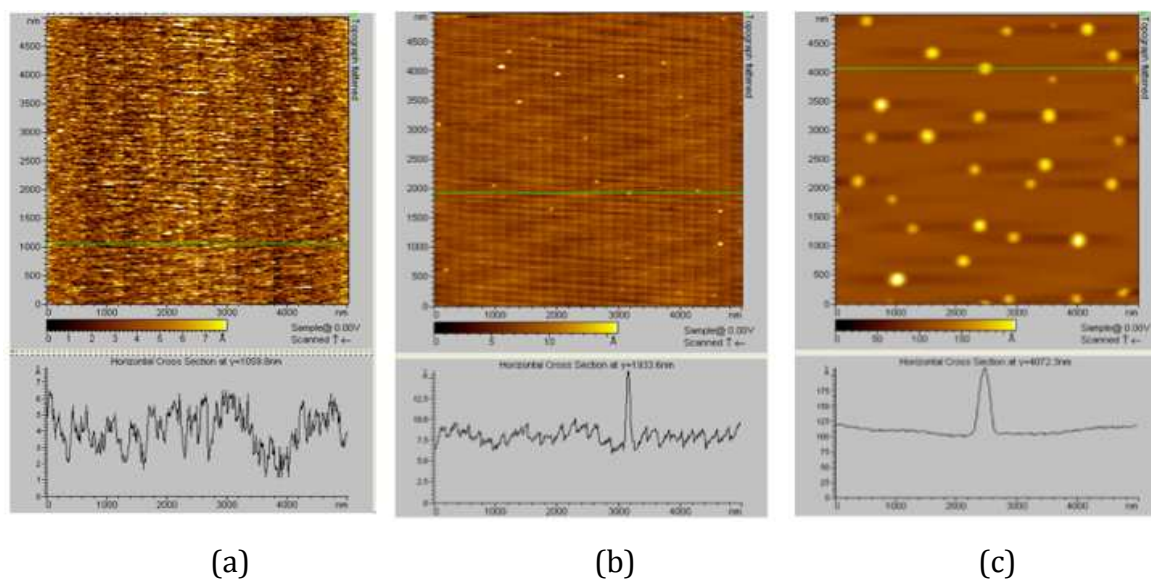

**Figure S5.** Topography images of (a) bare mica, and LB monolayers of (b)  $G_0$ CbtEG, and (c)  $G_1$ CbtEG transferred at  $\pi = 16$  mN/m.

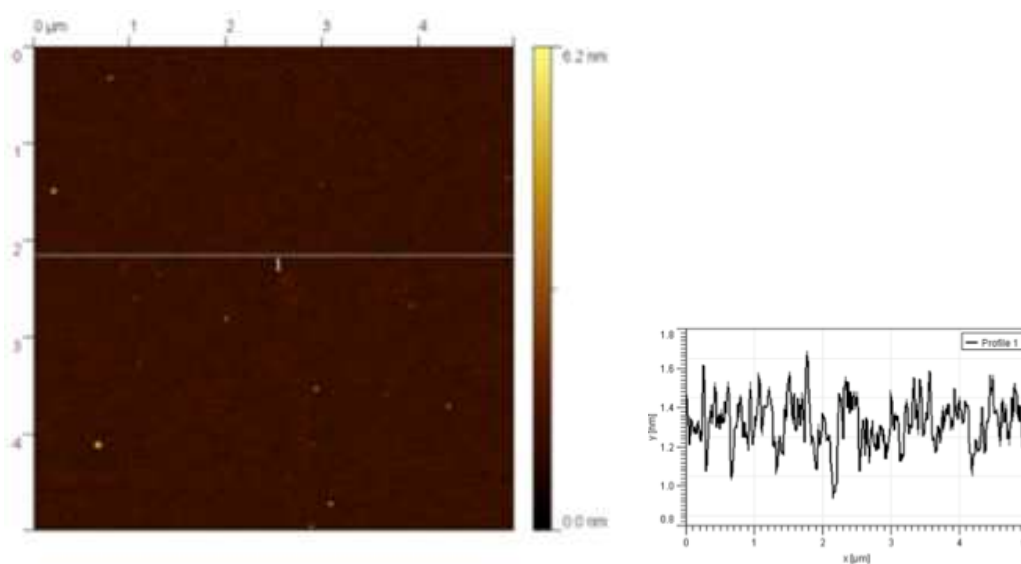

**Figure S6.** Topography images (AFM) image of a flat bare-doped Si surface.

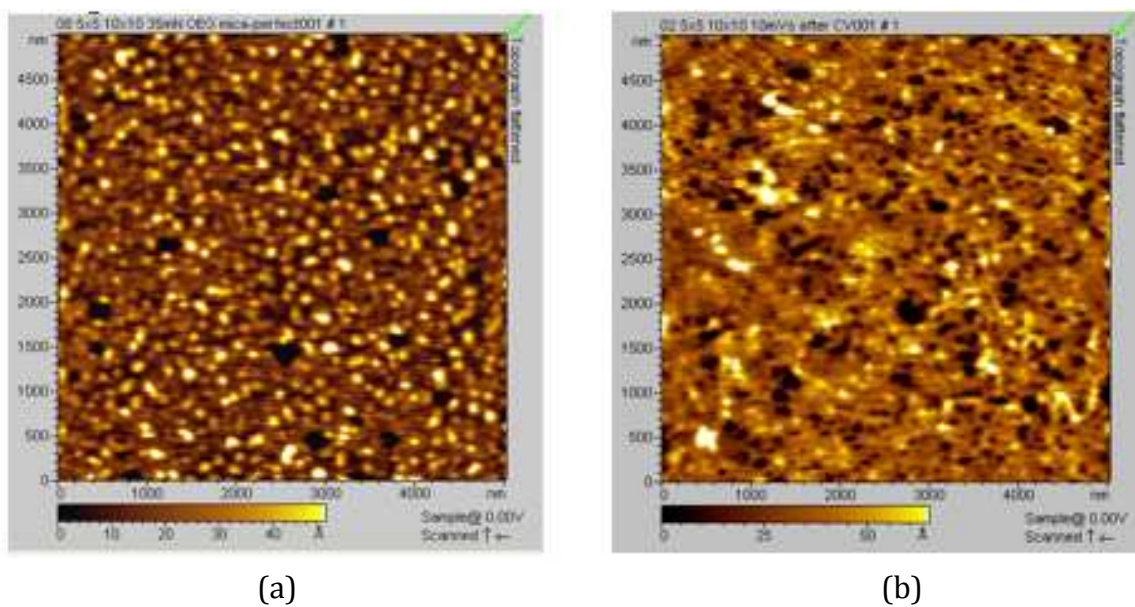

**Figure S7.**Topography images of G<sub>2</sub>CbzoEG (b) LB monolayer, and (c) after electrochemical cross-linking of the LB film.

#### IV. Radical cation mechanism for carbazole electropolymerization.

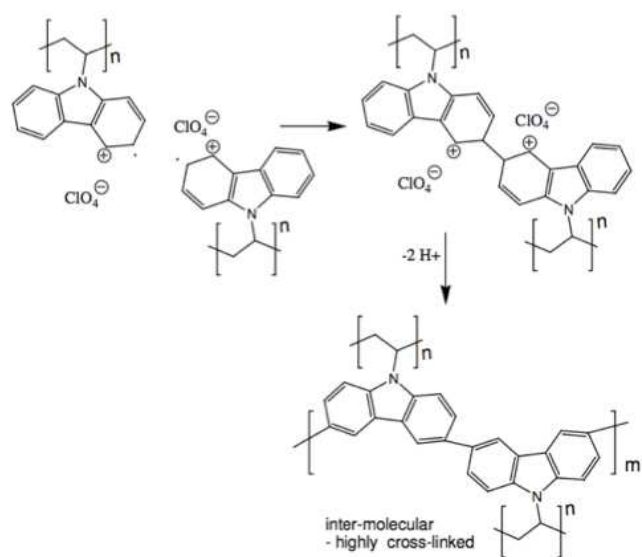

**Figure S8.** Mechanism for carbazole (PVK) electrochemical crosslinking.

**References:**

- (1) Felipe, M.J., Ponnampati, R., Dutta, P.; Pernites, R.; Advincula, R. *ACS Appl. Mater. Interfaces* **2010**, 2, 3401–3405.
